# Supplementary material for: The glutathione synthesis inhibitor buthionine sulfoximine synergistically enhanced melphalan activity against preclinical models of multiple myeloma
Source: PubMed Central journal article supplement — Blood Cancer J. 2014 Jul 18;4(7):e229–. doi: 10.1038/bcj.2014.45 (PMC4219442; doi:10.1038/bcj.2014.45), 2014-07-18
Supplement: bcj201445x1.pdf [file bcj201445x1.pdf]

# Supplementary Figure 1

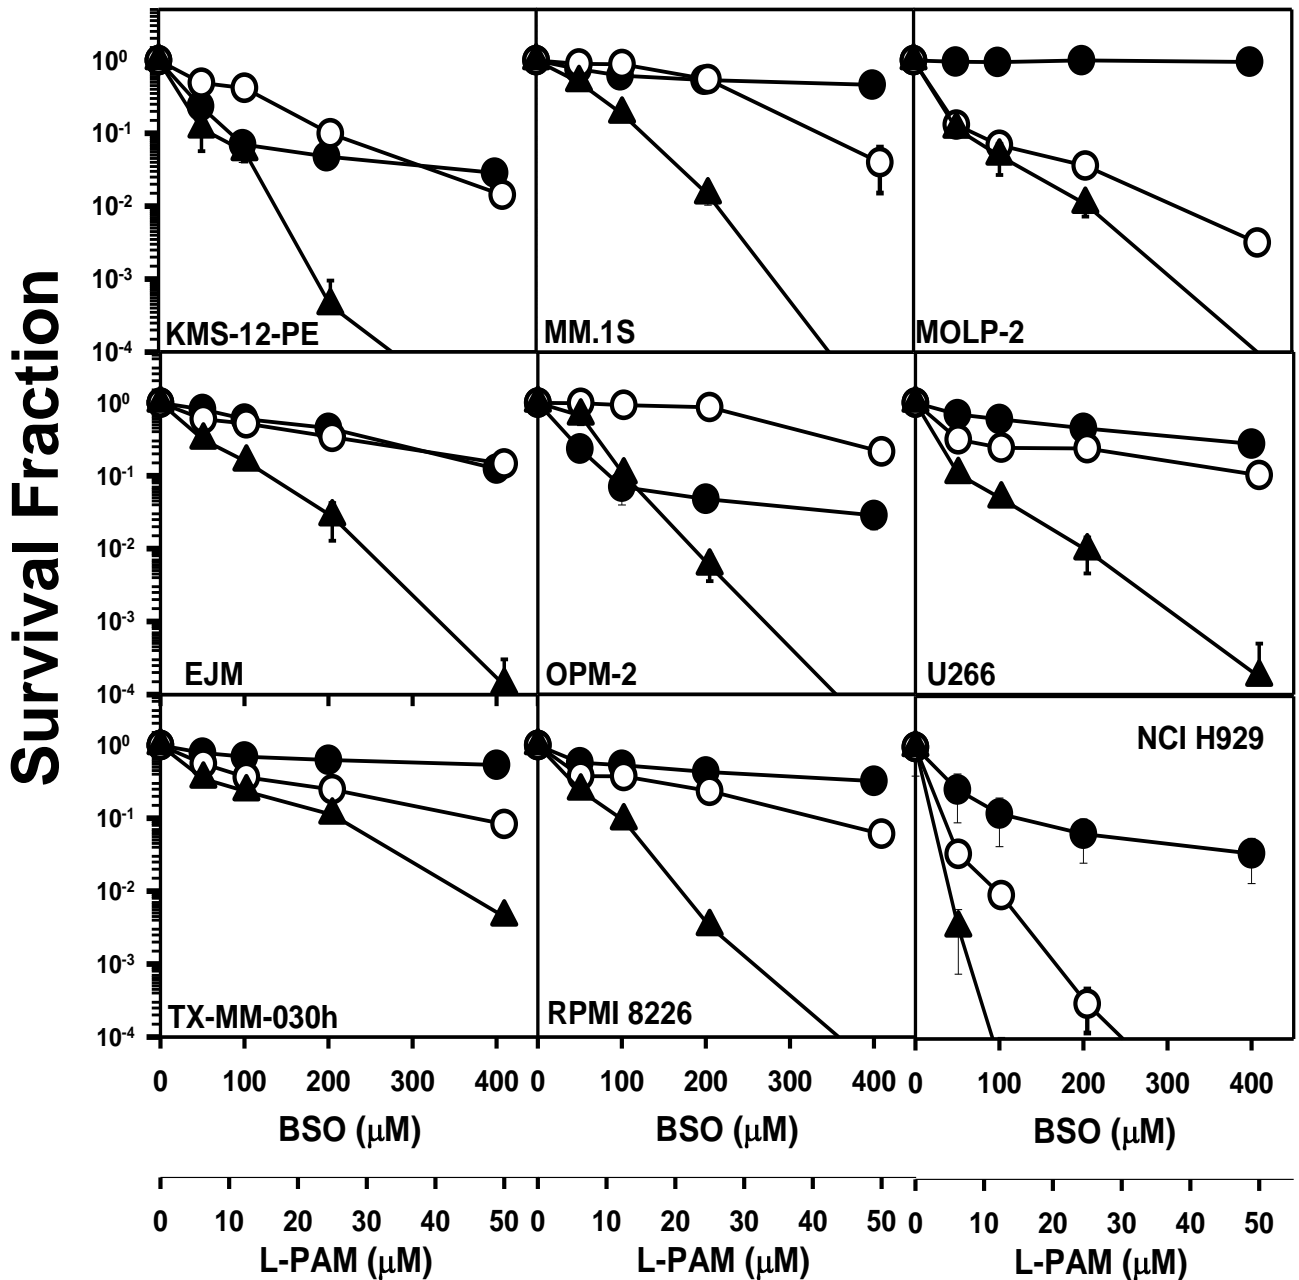

**Supplementary Figure 1.** Representative dose response curves of BSO (Black circles), L-PAM (Open circle), and BSO + L-PAM (Black triangle) in 9 MM cell lines at 20 % oxygen tension. Drug concentrations were 0 - 400  $\mu\text{M}$  for BSO and 0 - 50  $\mu\text{M}$  for L-PAM (Fixed ratio 8:1). No substantial difference in cytotoxicity was seen compared to 5% oxygen tension in all cell lines tested. The survival fraction was determined by mean fluorescence of the treated cells/mean fluorescence of control cells. Each condition had > 3 replicates and error bars represent standard deviation.
