# Supplementary material for: The glutathione synthesis inhibitor buthionine sulfoximine synergistically enhanced melphalan activity against preclinical models of multiple myeloma
Source: PubMed Central journal article supplement — Blood Cancer J. 2014 Jul 18;4(7):e229–. doi: 10.1038/bcj.2014.45 (PMC4219442; doi:10.1038/bcj.2014.45), 2014-07-18
Supplement: bcj201445x2.pdf [file bcj201445x2.pdf]

# Supplementary Figure 2

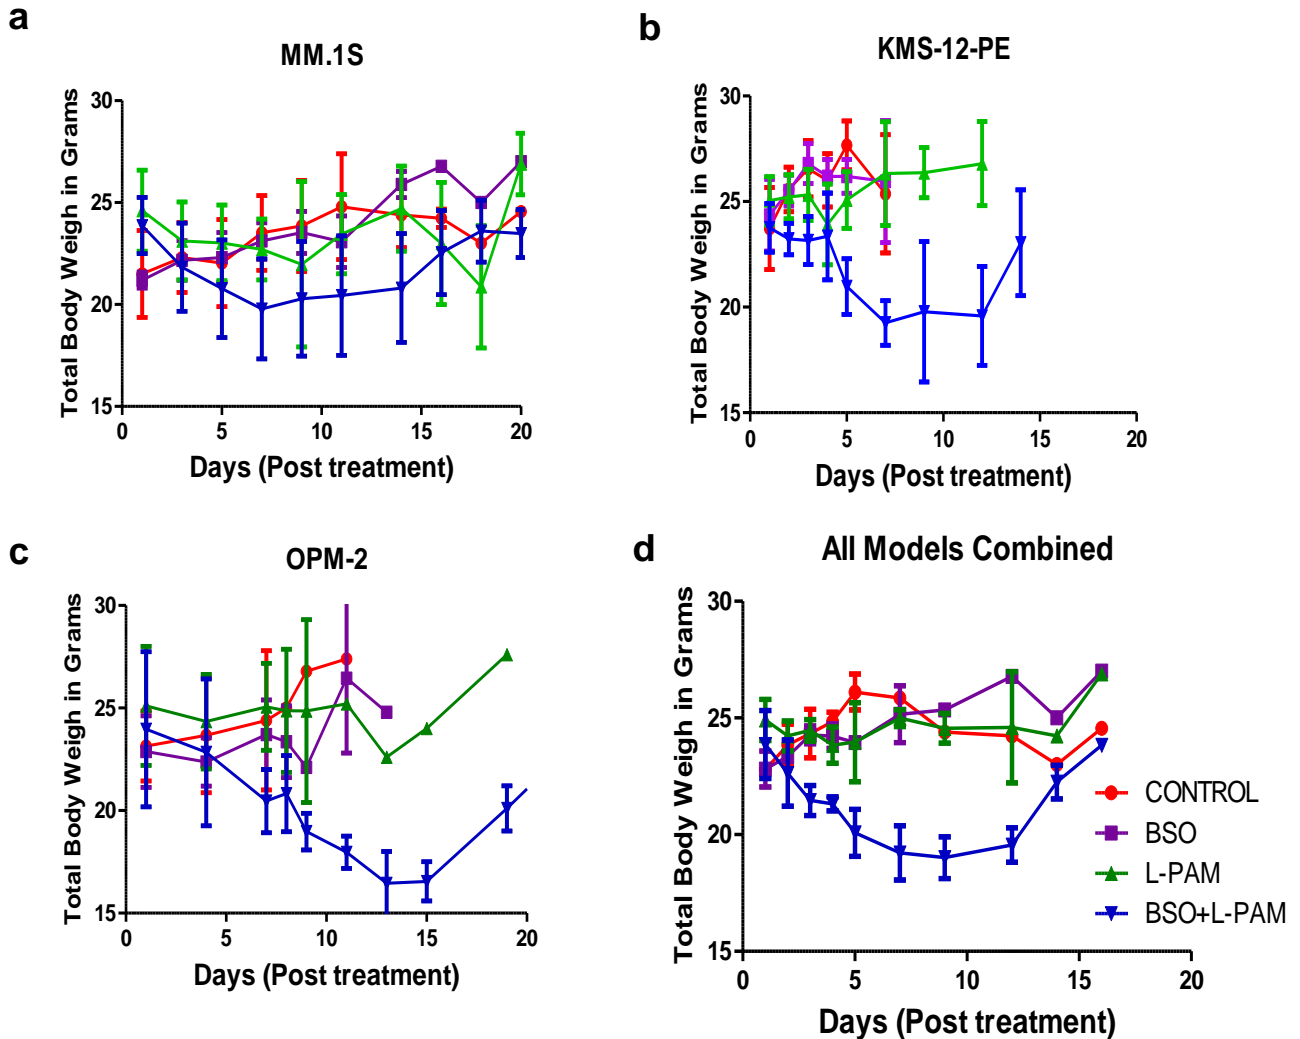

**Supplementary Figure 2.** Weight profile of MM xenograft models after treatment with BSO, L-PAM, and combination. Average body weight ( $\pm$  SD) of each group ( $n \geq 5$ ) of MM.1S (a), KMS-12-PE (b), OPM-2 (c) and all models combined (d). BSO + L-PAM treatment induced ~20-30% of weight loss in the first two weeks. Mice recovered from toxicity within three weeks. No significant difference was seen with L-PAM treatment, while BSO or vehicle treated mice showed a moderate weight gain.
