# Supplementary material for: The glutathione synthesis inhibitor buthionine sulfoximine synergistically enhanced melphalan activity against preclinical models of multiple myeloma
Source: PubMed Central journal article supplement — Blood Cancer J. 2014 Jul 18;4(7):e229–. doi: 10.1038/bcj.2014.45 (PMC4219442; doi:10.1038/bcj.2014.45), 2014-07-18
Supplement: bcj201445x3.pdf [file bcj201445x3.pdf]

# Supplementary Figure 3

MM.1S

RPMI 8226

U266

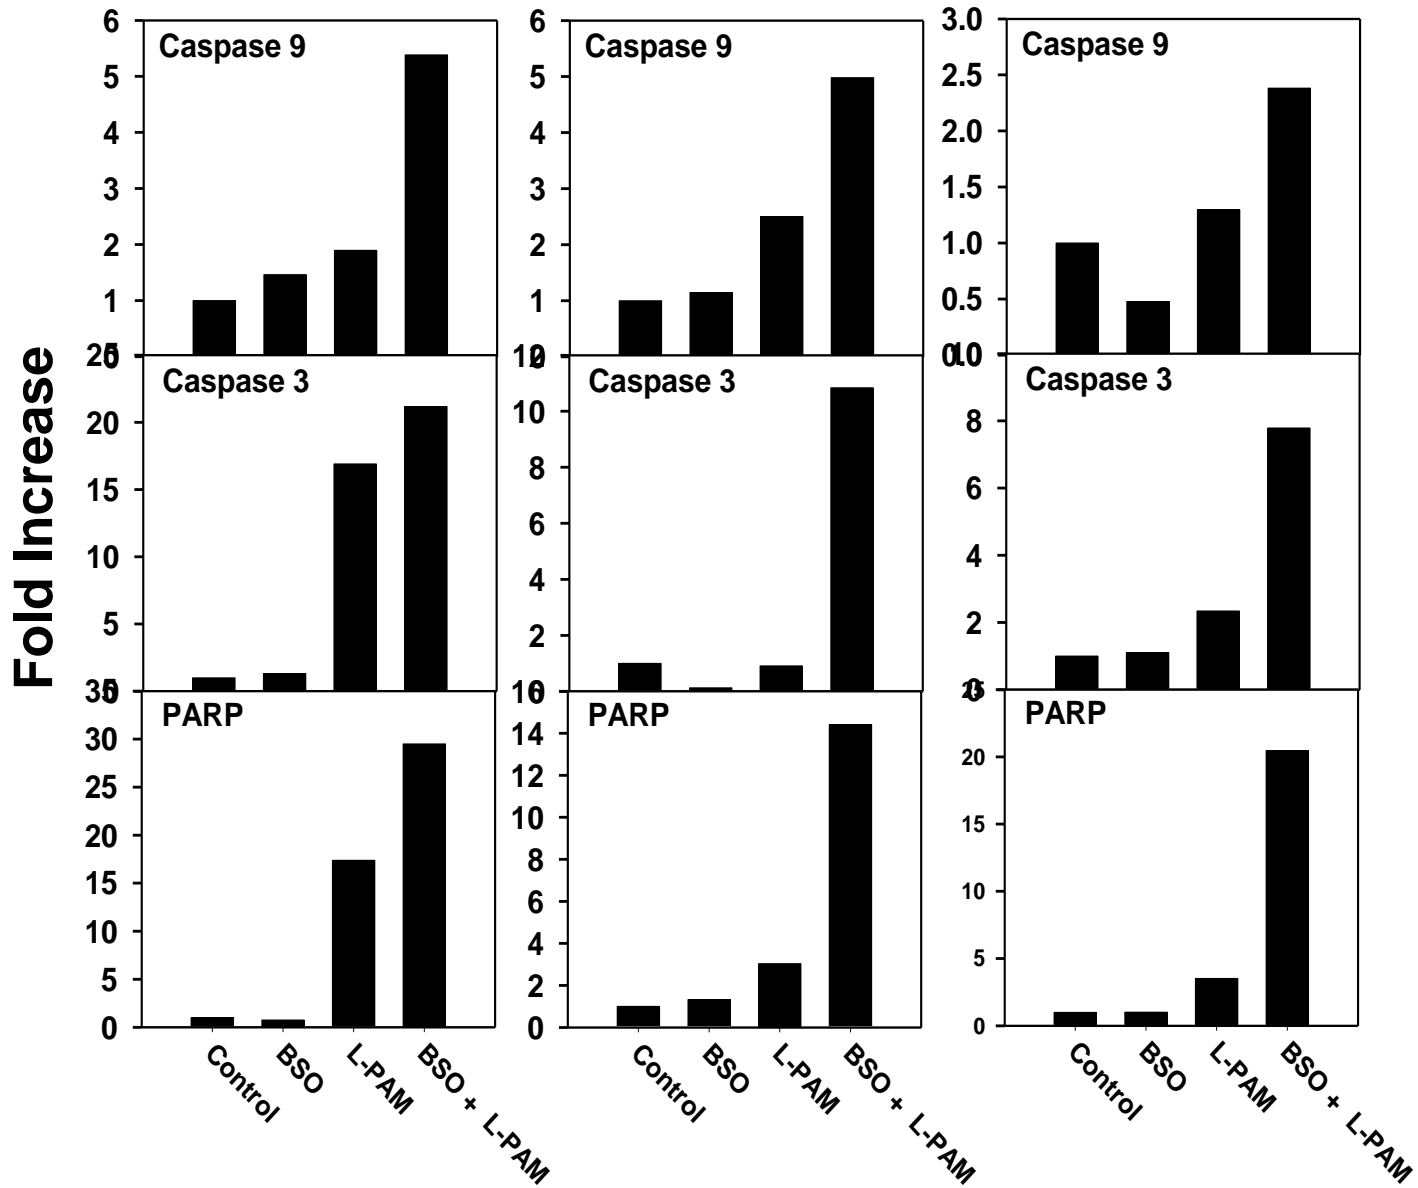

**Supplementary Figure 3:** Densitometry analysis of cleaved caspase and PARP as normalized by the total  $\beta$ -actin expression. Representative blots are shown in Figure 5a.
