# Supplementary material for: The glutathione synthesis inhibitor buthionine sulfoximine synergistically enhanced melphalan activity against preclinical models of multiple myeloma
Source: PubMed Central journal article supplement — Blood Cancer J. 2014 Jul 18;4(7):e229–. doi: 10.1038/bcj.2014.45 (PMC4219442; doi:10.1038/bcj.2014.45), 2014-07-18
Supplement: bcj201445x4.pdf [file bcj201445x4.pdf]

# Supplementary Figure 4

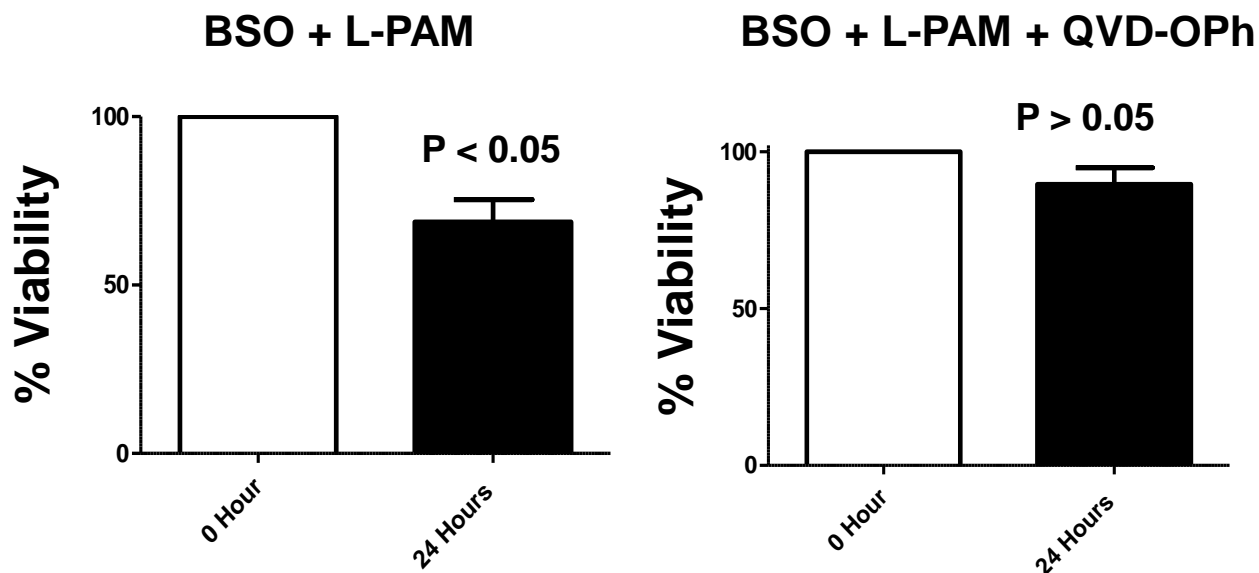

**Supplementary Figure 4:** Caspase inhibition abrogated cytotoxicity induced by BSO + L-PAM treatment in KMS-12-PE cell line. Percentage viability after treatment with BSO + L-PAM and BSO+L-PAM+QVD-OPh. QVD-OPh treatment reversed the cytotoxicity of BSO + L-PAM. The bars represent mean viability  $\pm$  SD ( $n \geq 3$ ) as determined by trypan blue exclusion assay.
