# Supplementary material for: The glutathione synthesis inhibitor buthionine sulfoximine synergistically enhanced melphalan activity against preclinical models of multiple myeloma
Source: PubMed Central journal article supplement — Blood Cancer J. 2014 Jul 18;4(7):e229–. doi: 10.1038/bcj.2014.45 (PMC4219442; doi:10.1038/bcj.2014.45), 2014-07-18
Supplement: bcj201445x5.pdf [file bcj201445x5.pdf]

# Supplementary Figure 5

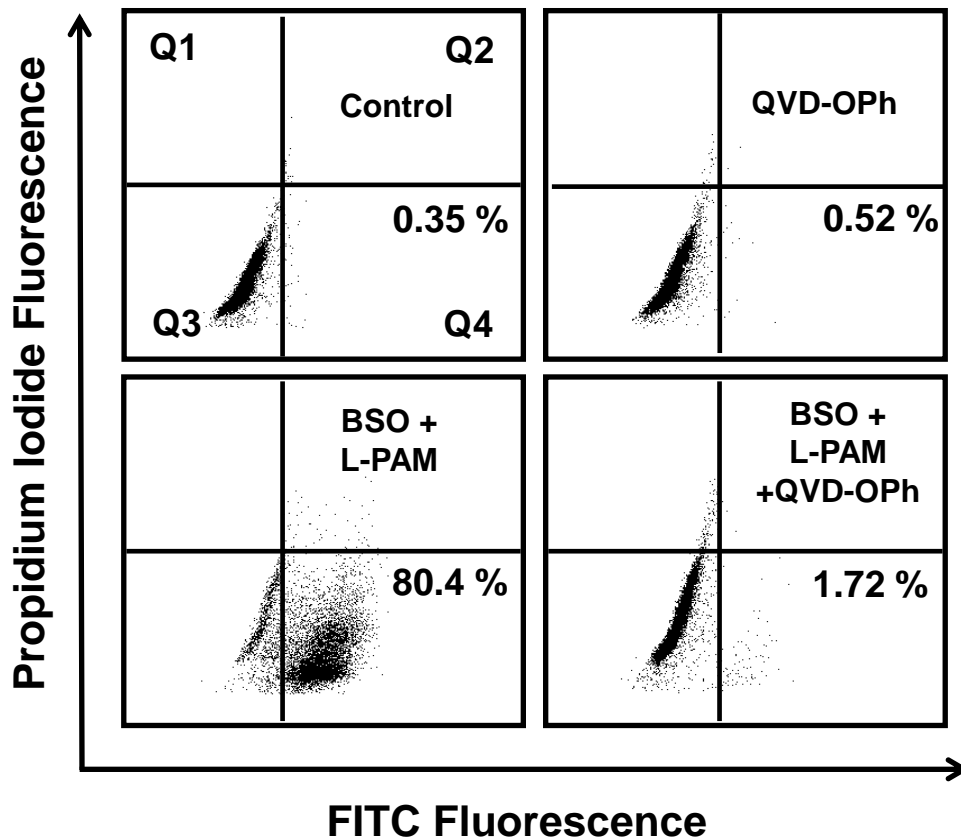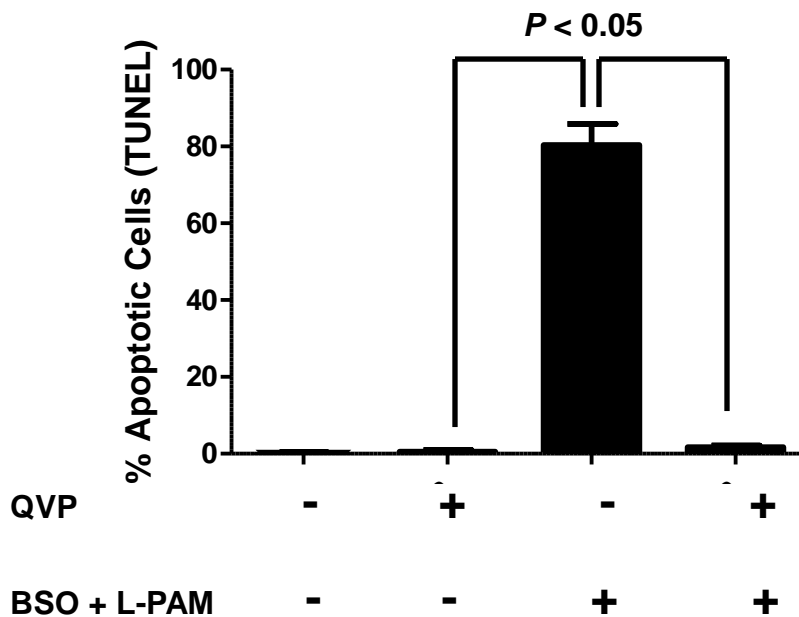

**Supplementary Figure 5:** Caspase inhibition reversed BSO + L-PAM induced apoptosis in KMS-12-PE cell line. Apoptosis was determined using TUNEL assay. Cells in Quadrant 4 (Q4; FITC+/PI-) were considered as apoptotic cells. Inhibition of caspase by QVD-OPh (5  $\mu$ M) significantly reversed ( $P < 0.05$ ) the BSO + L-PAM induced apoptosis. The bars represent mean fraction of apoptotic cells  $\pm$  SD ( $n \geq 3$ ) as determined by TUNEL assay.
