# Supplementary material for: The glutathione synthesis inhibitor buthionine sulfoximine synergistically enhanced melphalan activity against preclinical models of multiple myeloma
Source: PubMed Central journal article supplement — Blood Cancer J. 2014 Jul 18;4(7):e229–. doi: 10.1038/bcj.2014.45 (PMC4219442; doi:10.1038/bcj.2014.45), 2014-07-18
Supplement: bcj201445x6.pdf [file bcj201445x6.pdf]

# Supplementary Figure 6

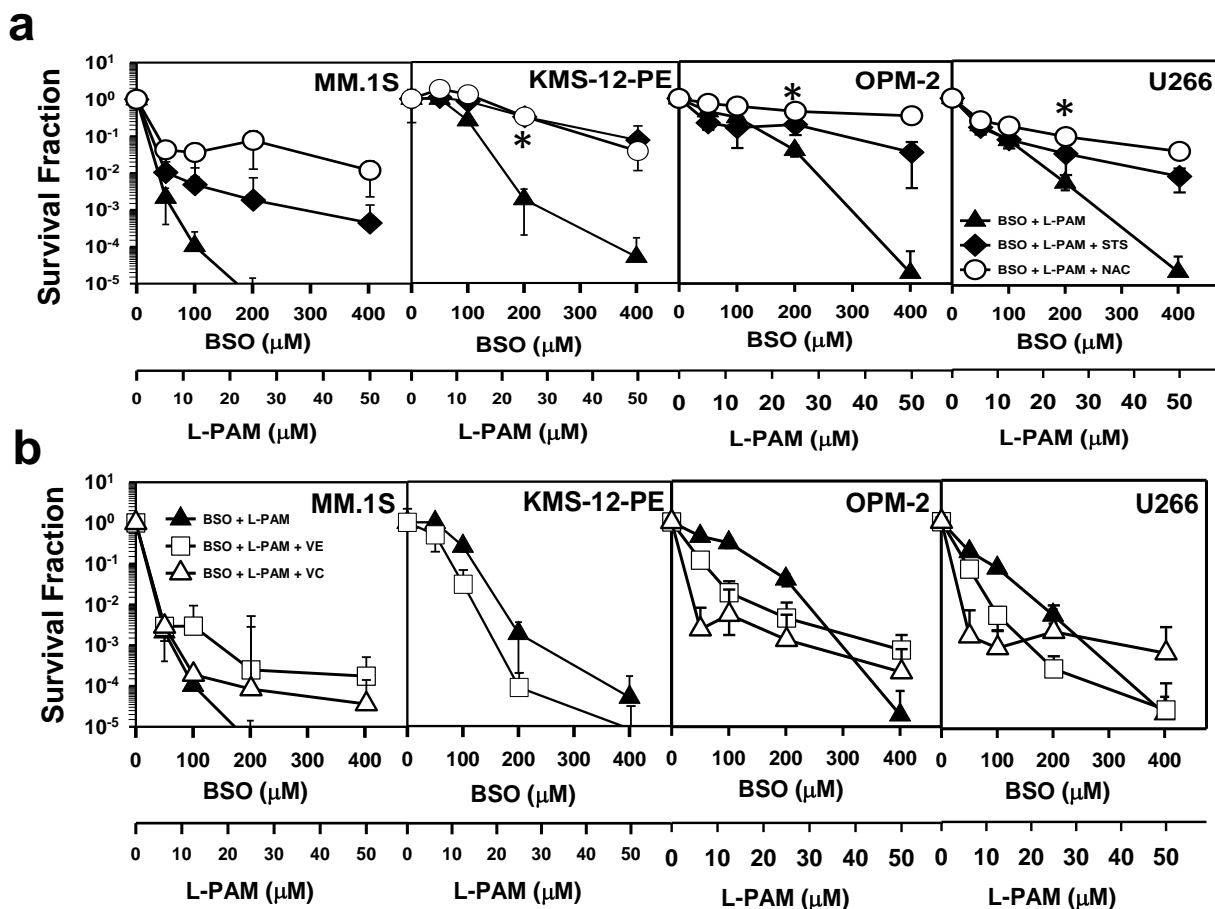

**Supplementary Figure 6:** MM cell lines were seeded ( $1-5 \times 10^3$ ) and treated with BSO (0-400  $\mu\text{M}$ ) for 24 hours. Antioxidant such as Sodium thiosulfate (STS), N-acetyl cysteine (NAC), Vitamin C, and Vitamin E were added 3 hours prior to the addition of L-PAM (0 – 50 $\mu\text{M}$ ). After total 96 hours of incubation the cytotoxicity was determined using DIMSCAN assay as described in methods. **(a)** Thiol containing anti-oxidant NAC and STS significantly ( $P < 0.05$ ) abolished BSO + L-PAM induced cytotoxicity in KMS-12-PE, OPM-2, and U266 cell lines. **(b)** Treatment with Vitamin C or Vitamin E did not reverse the cytotoxicity. Asterisk represent significant difference in the mean survival fraction when compared with ANOVA followed by tukey post hoc test.
